# Supplementary material for: Conversion of Natural Soil to Paddy Promotes Soil Organic Matter Degradation in Small-Particle Fractions: δ13C and Lipid Biomarker Evidence
Source: MDPI journal article supplement (doi:10.3390/agronomy14040818), 2024-04-15
Supplement: s1 [file s1]

## Supplementary Materials

# Conversion of Natural Soil to Paddy Promotes Soil Organic Matter Degradation in Small-Particle Fractions: $\delta^{13}\text{C}$ and Lipid Biomarker Evidence

Yuxuan Li <sup>1</sup>, Yan Li <sup>1</sup>, Yu Zhang <sup>1</sup>, Bingzhen Wu <sup>1</sup>, Dandan Zhou <sup>1</sup>, Hongbo Peng <sup>1,2</sup>, Fangfang Li <sup>1,\*</sup> and Min Wu <sup>1</sup>

<sup>1</sup> Yunnan Provincial Key Lab of Soil Carbon Sequestration and Pollution Control, Faculty of Environmental Science & Engineering, Kunming University of Science & Technology, Kunming 650500, China; 15572600335@163.com (Y.L.); li\_beerbears@163.com (Y.L.); 18087042170@163.com (Y.Z.); 15388698662@163.com (B.W.); 01yongheng@163.com (D.Z.); mzx817@163.com (H.P.); minwup@hotmail.com (M.W.)

<sup>2</sup> Faculty of Modern Agricultural Engineering, Kunming University of Science & Technology, Kunming 650500, China

\* Correspondence: fangkust@163.com; Tel./Fax: +86-871-65170906

Number of pages: 6

Number of tables: 1

Number of figures: 4

**Table S1.** The N, H, S content and C/N ratio in SOM before acid treatment

| <b>Soil fractions</b> | <b>Samples</b> | <b>N%</b> | <b>H%</b> | <b>S%</b> | <b>C/N</b> |
|-----------------------|----------------|-----------|-----------|-----------|------------|
| <b>clay</b>           | NS-TS          | 0.21      | 1.24      | 0.65      | 17.88      |
|                       | NS-SS          | 0.16      | 1.1       | 0.35      | 18.06      |
|                       | NS-DS          | 0.1       | 1.1       | 0.49      | 18.83      |
|                       | TP-TS          | 0.17      | 1.39      | 0.52      | 21.45      |
|                       | TP-SS          | 0.14      | 1.02      | 0.29      | 15.76      |
|                       | TP-DS          | 0.13      | 0.9       | 0.29      | 12.7       |
| <b>silt</b>           | NS-TS          | 0.11      | 0.67      | 0.5       | 31.15      |
|                       | NS-SS          | 0.07      | 0.54      | 0.29      | 30.29      |
|                       | NS-DS          | 0.03      | 0.48      | 0.36      | 41.17      |
|                       | TP-TS          | 0.08      | 0.69      | 0.72      | 32.82      |
|                       | TP-SS          | 0.04      | 0.29      | 0.41      | 24.9       |
|                       | TP-DS          | 0.05      | 0.2       | 0.4       | 12.31      |
| <b>sand</b>           | NS-TS          | 0.01      | 0.17      | 0.44      | 97.84      |
|                       | NS-SS          | 0         | 0.06      | 0.16      | -          |
|                       | NS-DS          | 0         | 0.05      | 0.17      | -          |
|                       | TP-TS          | 0.03      | 0.28      | 0.54      | 43.54      |
|                       | TP-SS          | 0.03      | 0.1       | 0.36      | 19.11      |
|                       | TP-DS          | 0.04      | 0.11      | 0.39      | 8.95       |

NS-natural soil, TP-tillage paddy. Soil layers are categorized as TS (0-20 cm), SS (20-40 cm), and DS (40-60 cm).

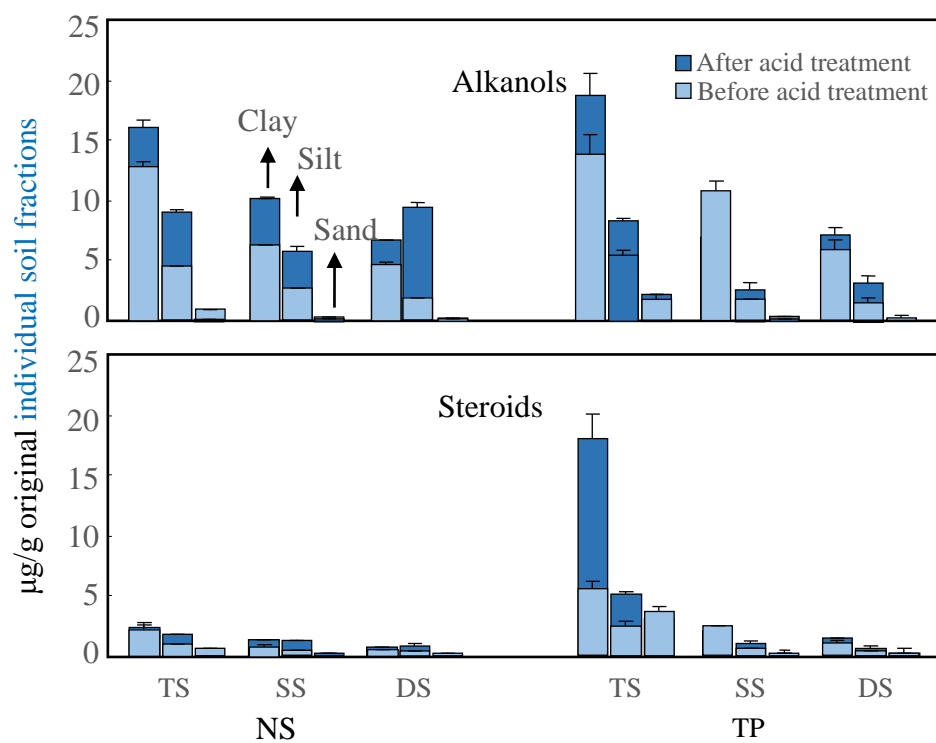

**Figure S1.** The concentration of alkanols and steroids before and after acid treatment.

NS-natural soil, TP-tillage paddy. Soil layers are categorized as TS (0-20 cm), SS (20-40 cm), and DS (40-60 cm).

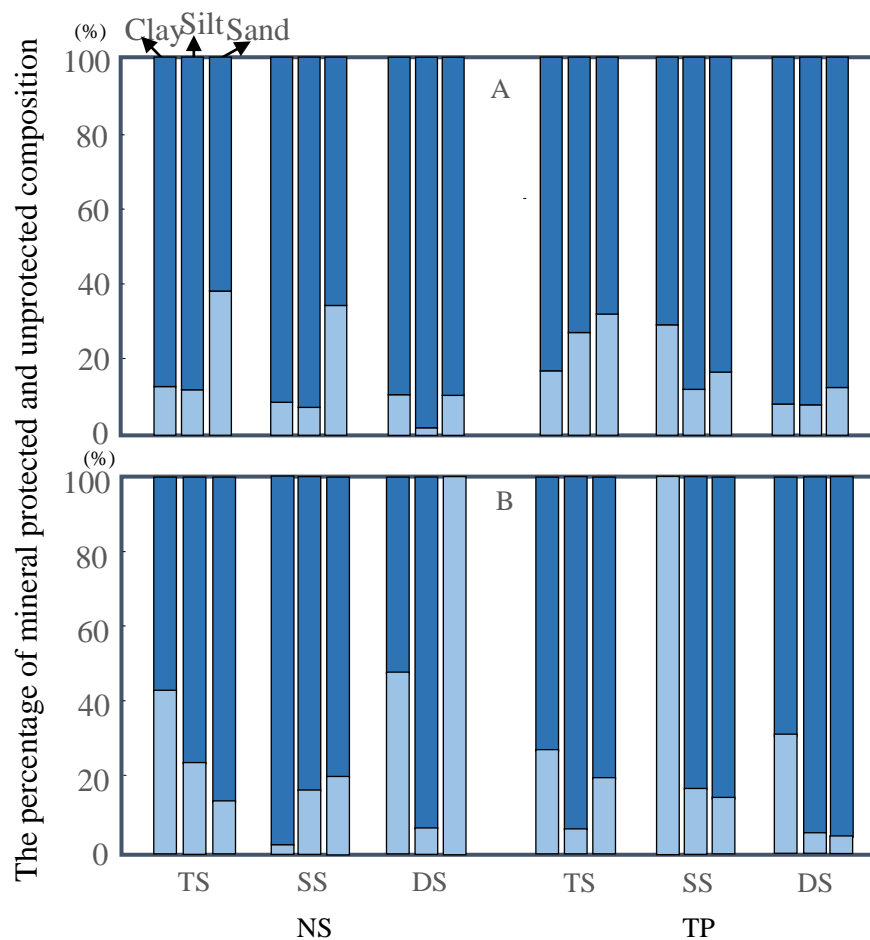

**Figure S2.** The percentage of alkanic acids (A) and alkanes (B) associated with minerals in overall alkanic acids and alkanes detected in different soil fractions. The dark colored columns represented mineral protected composition.

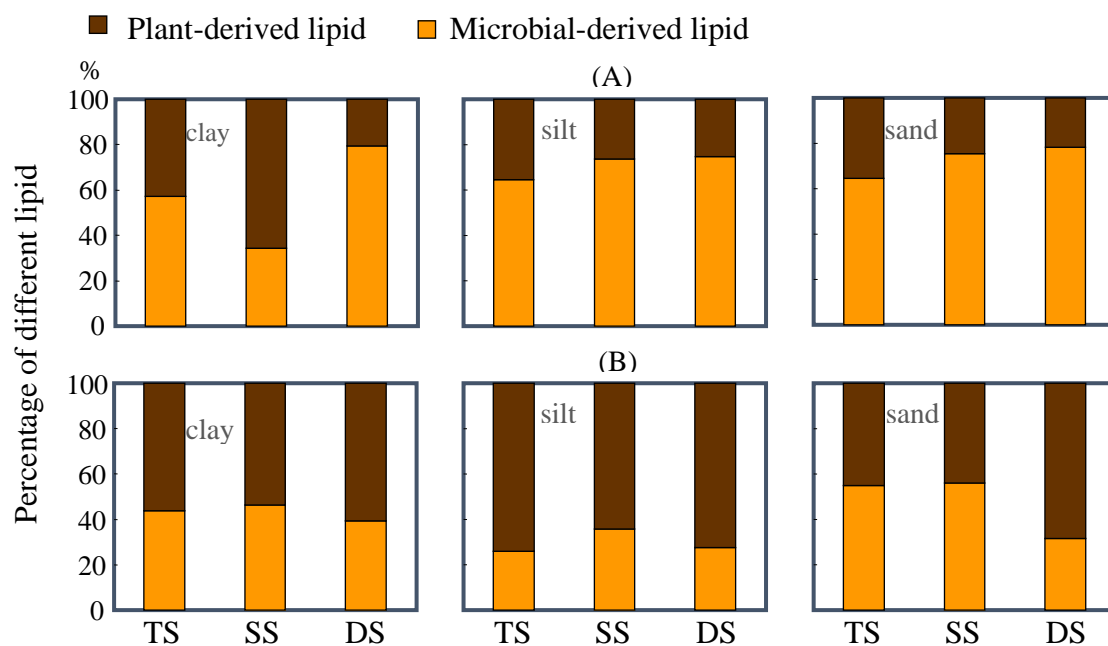

**Figure S3.** The percentage of microbial-derived lipid and plant-derived lipid of different soil size fractions in natural soil (A) and tillage paddy (B). Soil layers are categorized as TS (0-20 cm), SS (20-40 cm), and DS (40-60 cm).

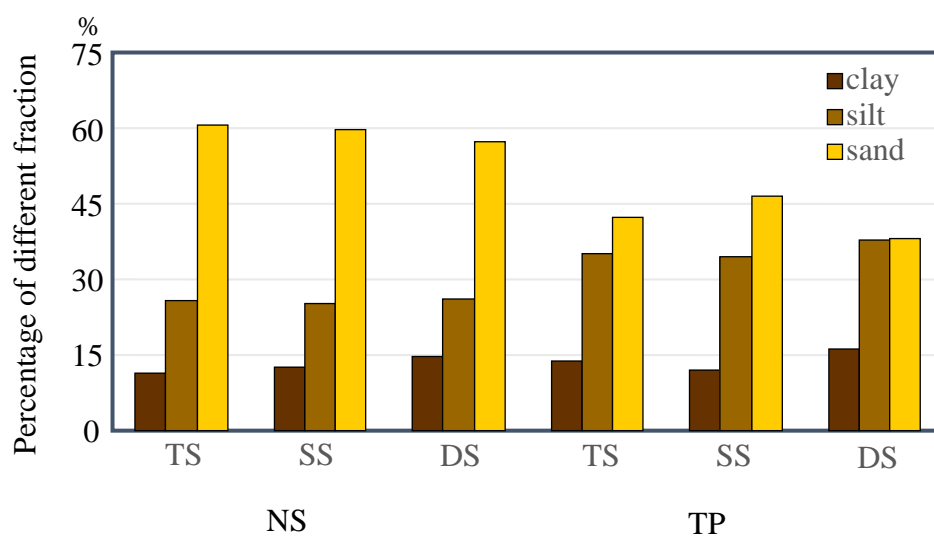

**Figure S4.** The percentage of clay, silt and sand fraction in soils. NS-natural soil, TP-tillage paddy. Soil layers are categorized as TS (0-20 cm), SS (20-40 cm), and DS (40-60 cm).
